# Supplementary material for: Study on the cultivation of seedlings using buds of potato (Solanum tuberosum L.)
Source: PeerJ. 2022 Sep 9;10:e13804. doi: 10.7717/peerj.13804 (PMC9466594; doi:10.7717/peerj.13804)
Supplement: File S1 — The original data showed the physiological indexes, growth indexes, yield and quality of all processed potatoes in different periods. These index data are used for statistical analysis between each treatment. [file peerj-10-13804-s001.xlsx]

## Sheet: Table
Table 1. The photosynthetic parameters indexes of different length potato bud seedling at seedling stage.
		Chlorophyll (mg/g)				Photosynthetically active radiation (PAR) μmol·m-2·s-1	Photosynthetic rate (Pn) μmolCO2·m-2·s-1				Transpiration rate (Tr) m·mol·m-2·s-1				Stomatal Conductance (Gs) m·mol·m-2·s-1
		Group I	Group II	Group III	Average		Group I	Group II	Group III	Average	Group I	Group II	Group III	Average	Group I	Group II	Group III	Average
Fujin	T1	2.01	1.69	1.91	1.87	1012	11.02	11.47	11.26	11.25	2.14	1.83	1.73	1.9	133	125	129	129
	T2	2.2	1.97	2.16	2.11	1012	13.19	13.9	13.41	13.5	2.5	2.13	2.27	2.3	152	139	147	146
	T3	2.69	2.37	2.5	2.52	1012	14.31	13.89	14.01	14.07	3.01	2.47	2.62	2.7	170	158	158	162
	CK	1.62	1.4	1.63	1.55	1012	9.47	10.25	11.18	10.3	1.69	1.21	1.6	1.5	118	107	108	111
Youjin	T1	1.72	1.39	1.63	1.58	1012	10.92	11.2	11.06	11.06	2.02	1.63	1.75	1.8	127	116	120	121
	T2	2.09	1.87	1.86	1.94	1012	12.87	12.3	12.63	12.6	2.37	1.98	2.25	2.2	143	130	141	138
	T3	2.42	2.07	2.41	2.3	1012	13.39	13.04	13.44	13.29	2.74	2.4	2.66	2.6	155	146	155	152
	CK	1.38	1.1	1.39	1.29	1012	9.87	10.35	10.08	10.1	1.69	1.15	1.36	1.4	117	107	106	110
Zhongshu 4	T1	2.47	2.16	2.27	2.3	1012	13.01	12.65	12.68	12.78	2.41	2.06	2.43	2.3	138	128	130	132
	T2	2.75	2.36	2.72	2.61	1012	14.2	14.56	14.44	14.4	2.75	2.31	2.74	2.6	161	154	153	156
	T3	3.27	2.97	3.12	3.12	1012	15.37	15.08	15.18	15.21	3.17	2.95	3.18	3.1	178	168	170	172
	CK	1.72	1.39	1.84	1.65	1012	10.89	10.42	10.79	10.7	1.78	1.54	1.78	1.7	127	118	124	123
Feiwurita	T1	2.02	1.69	1.87	1.86	1012	12.92	13.2	13.12	13.08	2.17	1.92	1.91	2	119	125	119	121
	T2	2.14	1.87	2.02	2.01	1012	14.95	15.27	15.08	15.1	2.56	2.14	2.5	2.4	142	129	131	134
	T3	2.54	2.27	2.6	2.47	1012	15.87	16.09	16.13	16.03	3.06	2.87	2.77	2.9	154	140	153	149
	CK	1.56	1.29	1.62	1.49	1012	11.52	11.13	11.25	11.3	1.74	1.31	1.45	1.5	117	102	108	109
Table 2. The photosynthetic parameters indexes of different positions of potato bud seedling at seedling stage.
		Chlorophyll (mg/g)				Photosynthetically active radiation (PAR) μmol·m-2·s-1	Photosynthetic rate (Pn) μmolCO2·m-2·s-1				Transpiration rate (Tr) m·mol·m-2·s-1				Stomatal Conductance (Gs) m·mol·m-2·s-1
		Group I	Group II	Group III	Average		Group I	Group II	Group III	Average	Group I	Group II	Group III	Average	Group I	Group II	Group III	Average
Fujin	T4	2.23	2.01	2.09	2.11	1012	13.66	13.26	13.58	13.5	2.6	2.15	2.15	2.3	159	136	143	146
	T5	2.03	1.84	1.95	1.94	1012	11.85	11.45	11.2	11.5	2.3	2	2	2.1	142	120	128	130
	T6	1.72	1.53	1.58	1.61	1012	11.4	10.08	10.32	10.6	1.85	1.5	1.45	1.6	124	109	118	117
	CK	1.62	1.47	1.56	1.55	1012	10.3	10.6	9.85	10.25	1.55	1.47	1.48	1.5	115	109	109	111
Youjin	T4	2.09	1.8	1.93	1.94	1012	13.05	12.08	12.67	12.6	2.35	2.05	2.2	2.2	147	129	138	138
	T5	1.71	1.32	1.59	1.54	1012	11.11	11.34	10.85	11.1	2.25	2.05	2	2.1	131	120	130	127
	T6	1.42	1.23	1.28	1.31	1012	9.7	10.68	10.52	10.3	1.72	1.47	1.31	1.5	119	107	119	115
	CK	1.36	1.19	1.32	1.29	1012	10.25	10.2	9.85	10.1	1.47	1.3	1.43	1.4	117	107	104	109.333
Zhongshu 4	T4	2.74	2.47	2.62	2.61	1012	14.68	14.02	14.5	14.4	2.85	2.47	2.48	2.6	165	142	161	156
	T5	2.3	2.03	2.1	2.14333	1012	12.47	12.05	12.68	12.4	2.39	2.07	2.14	2.2	145	138	140	141
	T6	1.88	1.62	1.66	1.72	1012	10.75	10.98	10.97	10.9	2	1.74	1.66	1.8	139	120	122	127
	CK	1.74	1.54	1.67	1.65	1012	10.71	10.87	10.52	10.7	1.91	1.52	1.67	1.7	129	117	123	123
Feiwurita	T4	2.12	1.87	2.04	2.01	1012	14.68	15.3	15.32	15.1	2.52	2.27	2.41	2.4	141	127	134	134
	T5	1.79	1.62	1.81	1.74	1012	13.31	13.21	13.68	13.4	2.21	1.87	2.22	2.1	128	115	117	120
	T6	1.6	1.44	1.49	1.51	1012	12.05	12.5	12.05	12.2	1.8	1.5	1.5	1.6	117	107	112	112
	CK	1.59	1.48	1.4	1.49	1012	11.31	11.38	11.21	11.3	1.67	1.32	1.51	1.5	118	101	108	109
Table 3. Growth indexes of potato seedlings developed from different lengths of potato buds.
		Plant height(cm)					Stem diameter (cm)					Number of compound leaves (piece)
		Group I	Group II	Group III	Average	STDEVP	Group I	Group II	Group III	Average	STDEVP	Group I	Group II	Group III	Average	STDEVP
Fujin	T1	10	9.44	8.97	9.47	0.42103	0.787	0.732	0.728	0.749	0.0269196	6.34	6.01	6.01	6.12	0.155563
	T2	10.98	10.51	10.73	10.74	0.192007	0.96	0.936	0.975	0.957	0.0160624	7.05	6.82	7.04	6.97	0.106145
	T3	12.67	12.01	11.77	12.15	0.380526	1.042	1.089	1.07	1.067	0.0193046	8.17	7.92	7.97	8.02	0.108012
	CK	7.15	9.02	8.19	8.12	0.765027	0.692	0.64	0.657	0.663	0.0216487	5.12	4.98	5.05	5.05	0.0571548
Youjin	T1	11.37	11.14	11.24	11.25	0.094163	0.84	0.81	0.801	0.817	0.0166733	6.96	6.67	7.13	6.92	0.189912
	T2	12.35	12.07	12	12.14	0.151217	0.957	0.927	0.945	0.943	0.0123288	7.65	7.31	7.54	7.5	0.141657
	T3	13.4	13.02	13.3	13.24	0.160831	1.023	1.004	1.027	1.018	0.0100333	8.9	8.59	8.79	8.76	0.128323
	CK	10.99	10.5	11.12	10.87	0.266958	0.662	0.621	0.652	0.645	0.0174547	6.3	6.02	5.98	6.1	0.142361
Zhongshu 4	T1	9.23	9.89	8.09	9.07	0.743505	1.02	0.989	0.997	1.002	0.0131403	6.21	5.91	6	6.04	0.125698
	T2	11.99	10.89	10.93	11.27	0.509379	1.171	0.827	0.996	0.998	0.140445	6.71	6.24	6.55	6.5	0.195107
	T3	12.98	12.5	12.86	12.78	0.203961	1.134	1.05	1.152	1.112	0.0444522	7.83	7.42	7.58	7.61	0.168721
	CK	8.62	8.41	8.68	8.57	0.115758	0.747	0.715	0.746	0.736	0.0148549	5.6	5.24	5.36	5.4	0.149666
Feiwurita	T1	10.47	10.09	10.28	10.28	0.155134	0.834	0.809	0.808	0.817	0.0120277	6.33	6.04	6.32	6.23	0.134412
	T2	11.09	11.68	11.4	11.39	0.24097	1.03	1.004	1.014	1.016	0.0107083	6.92	6.61	6.87	6.8	0.135892
	T3	12.98	13.34	12.71	13.01	0.25807	1.154	1.122	1.162	1.146	0.017282	7.64	8.01	7.96	7.87	0.163911
	CK	9.69	9.02	9.7	9.47	0.318224	0.841	0.786	0.749	0.792	0.0377977	5.92	5.63	5.85	5.8	0.123558
Table 4. Seedling quality of potato measured at seedling stage with different length of potato bud
		Shoot dry weight (g)					Root dry weight (g)					Root activity μg/ (g·h)					Average Plant height (cm)	Average Stem diameter (cm)	Root shoot ratio	Average Dry weight of whole plant(g)	Sound Seedling Index
		Group I	Group II	Group III	Average	STDEVP	Group I	Group II	Group III	Average	STDEVP	Group I	Group II	Group III	Average	STDEVP
Fujin	T1	1.012	0.877	0.793	0.894	0.0902109	0.237	0.187	0.2	0.208	0.0211818	133.58	127.34	129.8	130.24	2.5664	9.47	0.749	0.232662	1.102	0.343553
	T2	1.099	0.964	0.853	0.972	0.100588	0.301	0.204	0.242	0.249	0.0399082	154.39	149.18	153.06	152.21	2.21026	10.74	0.957	0.256173	1.221	0.421586
	T3	1.206	1.044	1.131	1.127	0.0661967	0.405	0.361	0.35	0.372	0.0237627	163.21	157.14	162.86	161.07	2.7826	12.15	1.067	0.33008	1.499	0.62643
	CK	0.946	0.825	0.734	0.835	0.086837	0.201	0.157	0.152	0.17	0.0220151	122.19	117.28	119.99	119.82	2.0081	8.12	0.663	0.203593	1.005	0.286669
Youjin	T1	0.806	0.724	0.864	0.798	0.057434	0.287	0.184	0.156	0.209	0.0563264	130.12	124.56	127.58	127.42	2.27268	11.25	0.817	0.261905	1.007	0.336869
	T2	0.906	0.968	0.796	0.89	0.0711243	0.281	0.201	0.202	0.228	0.0374789	141.17	137.15	140.45	139.59	1.7502	12.14	0.943	0.25618	1.118	0.373252
	T3	1.082	1.132	1.257	1.157	0.073598	0.401	0.302	0.287	0.33	0.0505767	144.86	139.97	141.62	142.15	2.03121	13.24	1.018	0.28522	1.487	0.538456
	CK	0.789	0.732	0.714	0.745	0.0319687	0.207	0.146	0.172	0.175	0.0249933	113.24	107.16	112.27	110.89	2.66707	10.87	0.645	0.234899	0.92	0.270698
Zhongshu 4	T1	0.91	0.861	0.842	0.871	0.0286473	0.227	0.186	0.199	0.204	0.0171075	150.58	146.27	147.66	148.17	1.79613	9.07	1.002	0.234214	1.075	0.370539
	T2	1.028	1.007	1.001	1.012	0.0115758	0.303	0.257	0.277	0.279	0.0188326	165.55	159.28	165.52	163.45	2.94866	11.27	0.998	0.275692	1.291	0.470241
	T3	1.3	1.351	1.3	1.317	0.0240416	0.403	0.354	0.389	0.382	0.0206074	173.14	168.17	169.23	170.18	2.1373	12.78	1.112	0.290053	1.699	0.640632
	CK	0.87	0.79	0.62	0.76	0.104243	0.201	0.151	0.194	0.182	0.0221058	131.24	127.16	131.18	129.86	1.90935	8.57	0.736	0.239474	0.942	0.306484
Feiwurita	T1	0.99	0.941	0.955	0.962	0.0206074	0.299	0.202	0.267	0.256	0.0403567	134.27	128.16	129.55	130.66	2.61497	10.28	0.817	0.266112	1.218	0.420925
	T2	1.145	1.1	1.115	1.12	0.0187083	0.324	0.274	0.308	0.302	0.0208487	150.17	142.17	153.91	148.75	4.89688	11.39	1.016	0.269643	1.422	0.510276
	T3	1.527	1.584	1.575	1.562	0.02502	0.469	0.401	0.393	0.421	0.0340979	155.05	150.69	154.13	153.29	1.87645	13.01	1.146	0.269526	1.983	0.709145
	CK	0.79	0.743	0.777	0.77	0.0198158	0.21	0.174	0.204	0.196	0.015748	117.14	112.13	115.97	115.08	2.13995	9.47	0.792	0.254545	0.966	0.32668
Table 5. Growth indexes of potato seedlings developed with different positions of potato bud
		Plant height(cm)					Stem diameter (cm)					Number of compound leaves (piece)
		Group I	Group II	Group III	Average	STDEVP	Group I	Group II	Group III	Average	STDEVP	Group I	Group II	Group III	Average	STDEVP
Fujin	T4	10.98	10.51	10.73	10.74	0.192007	0.99	0.927	0.954	0.957	0.025807	7	6.8	6.81	6.87	0.0920145
	T5	10.09	9.72	9.8	9.87	0.158955	0.89	0.791	0.728	0.803	0.0666783	6.5	6.05	6.05	6.2	0.212132
	T6	9.19	8.89	8.95	9.01	0.129615	0.709	0.687	0.686	0.694	0.0106145	6.1	5.8	5.95	5.95	0.122474
	CK	8.15	8.02	8.19	8.12	0.0725718	0.699	0.659	0.631	0.663	0.0279046	5.2	4.95	5	5.05	0.108012
Youjin	T4	12.35	12.07	12	12.14	0.151217	0.997	0.91	0.922	0.943	0.0384968	8.1	7.2	7.2	7.5	0.424264
	T5	11.8	11.02	11.8	11.54	0.367696	0.891	0.807	0.783	0.827	0.0463033	7.1	6.75	7	6.95	0.147196
	T6	11.34	10.35	11.25	10.98	0.44699	0.791	0.687	0.625	0.701	0.0684884	6.75	6.7	6.71	6.72	0.0216025
Youjin	CK	10.99	10.5	11.12	10.87	0.266958	0.698	0.603	0.634	0.645	0.0395559	6.3	6.05	5.95	6.1	0.147196
Zhongshu 4	T4	11.99	10.89	10.93	11.27	0.509379	1.003	0.98	1.008	0.997	0.0121929	6.8	6.35	6.35	6.5	0.212132
	T5	10.47	10.02	10.38	10.29	0.194422	0.934	0.887	0.876	0.899	0.0251529	6.2	5.9	5.9	6	0.141421
	T6	10.09	9.71	10.14	9.98	0.192007	0.803	0.741	0.778	0.774	0.0254689	5.95	5.8	5.8	5.85	0.0707107
	CK	8.62	8.41	8.68	8.57	0.115758	0.755	0.702	0.748	0.735	0.0235089	5.7	5.35	5.15	5.4	0.227303
Feiwurita	T4	11.09	11.68	11.4	11.39	0.24097	1.102	0.987	0.953	1.014	0.0637547	6.95	6.65	6.8	6.8	0.122474
	T5	10.89	10.23	10.59	10.57	0.269815	0.992	0.892	0.897	0.927	0.0460072	6.5	6.1	6.45	6.35	0.177951
	T6	9.9	10.19	9.97	10.02	0.123558	0.893	0.801	0.823	0.839	0.0392258	6.1	5.7	5.9	5.9	0.163299
	CK	9.69	9.02	9.7	9.47	0.318224	0.721	0.8	0.855	0.792	0.054997	5.95	5.65	5.8	5.8	0.122474
Table 6. Seedling quality of potato measured at seedling stage with different positions of potato bud.
		Shoot dry weight (g)					Root dry weight (g)					Root activity μg/ (g·h)					Average Plant height (cm)	Average Stem diameter(cm)	Root shoot ratio	Average Dry weight of whole plant(g)	Sound Seedling Index
		Group I	Group II	Group III	Average	STDEVP	Group I	Group II	Group III	Average	STDEVP	Group I	Group II	Group III	Average	STDEVP
Fujin	T4	0.99	0.955	0.971	0.972	0.0143062	0.27	0.258	0.219	0.249	0.0217715	160.02	147.2	149.23	152.15	5.6263	10.74	0.957	0.256	1.221	0.421375
	T5	0.962	0.94	0.918	0.94	0.0179629	0.21	0.212	0.184	0.202	0.0127541	130.72	146.33	142.89	139.98	6.69672	9.87	0.803	0.214	1.142	0.337298
	T6	0.895	0.86	0.9	0.885	0.0177951	0.21	0.16	0.185	0.185	0.0204124	117.89	129.9	116.83	121.54	5.92723	9.01	0.694	0.208	1.07	0.304977
	CK	0.85	0.815	0.84	0.835	0.0147196	0.183	0.17	0.157	0.17	0.0106145	121.42	116.8	121.24	119.82	2.13673	8.12	0.663	0.203	1.005	0.286073
Youjin	T4	0.91	0.88	0.88	0.89	0.0141421	0.244	0.208	0.232	0.228	0.0149666	143.6	127.3	147.87	139.59	8.86346	12.14	0.943	0.256	1.118	0.373051
	T5	0.865	0.825	0.875	0.855	0.0216025	0.212	0.186	0.193	0.197	0.0109848	125.13	120.5	127.3	124.31	2.83599	11.54	0.827	0.23	1.052	0.31735
	T6	0.83	0.77	0.77	0.79	0.0282843	0.198	0.178	0.164	0.18	0.0139523	120.7	111.27	113.63	115.2	4.00665	10.98	0.701	0.227	0.97	0.282118
	CK	0.775	0.71	0.75	0.745	0.0267706	0.195	0.16	0.17	0.175	0.0147196	110.52	107.25	114.9	110.89	3.13404	10.87	0.645	0.234	0.92	0.269871
Zhongshu 4	T4	1.1	0.985	0.951	1.012	0.0637547	0.286	0.258	0.293	0.279	0.0151217	172.05	154.9	163.4	163.45	7.00155	11.27	0.997	0.276	1.291	0.470524
	T5	0.982	0.947	0.951	0.96	0.0156418	0.224	0.191	0.212	0.209	0.0136382	137.4	141.98	150.4	143.26	5.38385	10.29	0.899	0.217	1.169	0.355804
	T6	0.835	0.798	0.827	0.82	0.0158955	0.188	0.16	0.174	0.174	0.011431	127.4	142.9	136.11	135.47	6.34401	9.98	0.774	0.212	0.994	0.30814
	CK	0.785	0.74	0.755	0.76	0.0187083	0.194	0.162	0.19	0.182	0.0142361	131.27	126.71	131.6	129.86	2.23146	8.57	0.735	0.239	0.942	0.305928
Feiwurita	T4	1.15	0.995	1.215	1.12	0.0922858	0.31	0.266	0.33	0.302	0.0267333	150.25	143.35	152.65	148.75	3.94208	11.39	1.014	0.269	1.422	0.509112
	T5	0.985	0.94	0.985	0.97	0.0212132	0.262	0.238	0.241	0.247	0.0106771	142.19	129.75	139.75	137.23	5.38214	10.57	0.927	0.254	1.217	0.41585
	T6	0.86	0.82	0.84	0.84	0.0163299	0.228	0.202	0.197	0.209	0.0135892	127.21	117.18	115.88	120.09	5.0625	10.02	0.839	0.248	1.049	0.347987
	CK	0.795	0.8	0.715	0.77	0.0389444	0.204	0.18	0.204	0.196	0.0113137	115.24	112.08	117.92	115.08	2.38685	9.47	0.792	0.255	0.966	0.327119
Table 7. Growth indexes of potato seedlings with different length of potato bud in potato tuber expansion stage.
		Plant height(cm)					Stem diameter (cm)					leaf area (cm2)
		Group I	Group II	Group III	Average	STDEVP	Group I	Group II	Group III	Average	STDEVP	Group I	Group II	Group III	Average	STDEVP
Fujin	T1	54.13	53.27	54.87	54.09	0.653809	13.67	13.21	13.35	13.41	0.192527	6189	6247	6191	6209	26.8825
	T2	61.24	59.02	59.38	59.88	0.972831	15.98	15.61	15.63	15.74	0.169902	6601	6537	6578	6572	26.4701
	T3	65.09	63.87	63.4	64.12	0.712227	16.42	16.14	16.34	16.3	0.117757	6701	6739	6744	6728	19.2007
	CK	49.24	48.03	47.24	48.17	0.822476	12.38	11.97	12.37	12.24	0.190962	5800	5757	5807	5788	22.1058
Youjin	T1	63.9	61.24	60.98	62.04	1.31949	13.01	12.69	12.64	12.78	0.163911	6409	6381	6392	6394	11.5181
	T2	70.32	68.47	69.77	69.52	0.775672	15.04	14.78	15.06	14.96	0.127541	6812	6782	6803	6799	12.5698
	T3	74	72.09	73.15	73.08	0.781324	15.46	15.22	15.22	15.3	0.113137	6945	6916	6950	6937	14.9889
	CK	64.01	62.57	63.23	63.27	0.588558	12.04	11.6	11.58	11.74	0.212289	6004	5972	5991	5989	13.1403
Zhongshu 4	T1	54.72	53.89	53.78	54.13	0.419603	12.98	13.4	13.34	13.24	0.185472	6492	6473	6493	6486	9.20145
	T2	60.41	58.33	58.92	59.22	0.875252	16.09	15.87	16.01	15.99	0.0909212	6789	6814	6827	6810	15.7692
	T3	66.24	64.74	66.42	65.8	0.753127	16.8	16.57	16.64	16.67	0.0962635	6892	6903	6968	6921	33.5361
	CK	48.08	46.04	49.31	47.81	1.34855	12.56	12.24	12.37	12.39	0.131403	6003	6024	6024	6017	9.89949
Feiwurita	T1	64.01	62.74	62.4	63.05	0.692868	13.03	12.6	12.71	12.78	0.182392	6475	6430	6463	6456	19.0263
	T2	68.03	67.08	66.76	67.29	0.539321	15.16	14.89	15.22	15.09	0.143527	6736	6689	6705	6710	19.5107
	T3	72.17	71.14	72.21	71.84	0.495244	15.9	16.17	16.17	16.08	0.127279	6943	6897	6938	6926	20.6074
	CK	58.09	57.21	58.64	57.98	0.588954	11.8	11.43	11.9	11.71	0.202155	5952	5894	5938	5928	24.7117
Table 8. Growth indexes of potato seedlings with different positions of potato bud in potato tuber expansion stage.
		Plant height(cm)					Stem diameter (cm)					leaf area (cm2)
		Group I	Group II	Group III	Average	STDEVP	Group I	Group II	Group III	Average	STDEVP	Group I	Group II	Group III	Average	STDEVP
Fujin	T4	61.23	58.17	60.24	59.88	1.27491	15.9	16.04	15.74	15.74	0.33	6620	6501	6595	6572	51.2315
	T5	58.17	56.34	58.11	57.54	0.848882	15.2	14.56	14.98	14.98	0.29	6502	6230	6528	6420	134.769
	T6	50.27	48.1	49.71	49.36	0.919819	12.38	11.86	12.01	12.01	0.26	6172	5988	6071	6077	75.2374
	CK	49.25	47.27	47.99	48.17	0.818291	12.09	11.86	11.99	11.99	0.09	5988	5701	5675	5788	141.819
Youjin	T4	70.89	69.02	68.65	69.52	0.980442	15.2	14.86	14.96	14.96	0.17	6829	6674	6894	6799	92.2858
	T5	69.7	67.01	68.67	68.46	1.10818	13.99	14.59	14.27	14.27	0.24	6721	6527	6555	6601	85.6193
	T6	66.02	63.19	63.33	64.18	1.30233	12.35	11.86	11.98	11.98	0.26	6398	6128	6221	6249	111.991
	CK	64.57	62.8	62.44	63.27	0.930914	11.56	11.98	11.74	11.74	0.17	6108	5967	5892	5989	89.5433
Zhongshu 4	T4	60.29	57.14	60.23	59.22	1.47099	15.89	16.05	15.99	15.99	0.07	6913	6794	6723	6810	78.3879
	T5	59.27	55.02	57.13	57.14	1.73507	15.32	14.89	15.02	15.02	0.21	6609	6427	6485	6507	75.9122
	T6	50.1	47.25	49.35	48.9	1.20623	12.68	13.08	12.94	12.94	0.18	6281	6012	6307	6200	133.359
	CK	49.02	45.27	49.14	47.81	1.79672	12.24	12.59	12.39	12.39	0.14	6099	5925	6027	6017	71.3863
Feiwurita	T4	68.92	66.07	66.88	67.29	1.19908	14.89	15.24	15.09	15.09	0.14	6802	6614	6714	6710	76.8028
	T5	66.52	64.21	64.48	65.07	1.03121	14.61	14.87	14.62	14.62	0.2	6534	6400	6443	6459	55.8629
	T6	60.11	58.24	61.11	59.82	1.18948	11.86	12.05	11.98	11.98	0.08	6218	6009	6085	6104	86.3752
	CK	58.95	56.2	58.79	57.98	1.26034	11.9	11.58	11.71	11.71	0.13	5909	5874	6001	5928	53.5599
Table 9. The photosynthetic parameters index of different length of potato bud seedling in potato tuber expansion stage.
		Chlorophyll (mg/g)					Photosynthetically active radiation (PAR) μmol·m-2·s-1	Photosynthetic rate (Pn) μmolCO2·m-2·s-1					Transpiration rate (Tr) m·mol·m-2·s-1					Stomatal Conductance (Gs) m·mol·m-2·s-1
		Group I	Group II	Group III	Average	STDEVP		Group I	Group II	Group III	Average	STDEVP	Group I	Group II	Group III	Average	STDEVP	Group I	Group II	Group III	Average	STDEVP
Fujin	T1	3.1	2.87	2.91	2.96	0.100333	1125	16.6	15.9	16.7	16.4	0.355903	3.7	3.23	3.57	3.5	0.198158	247	230	243	240	7.25718
	T2	3.42	3.25	3.29	3.32	0.0725718	1125	17.5	16.9	17.5	17.3	0.282843	4.15	3.74	3.81	3.9	0.179072	262	243	248	251	8.04156
	T3	3.9	3.66	3.57	3.71	0.139284	1125	18.8	18.4	18.3	18.5	0.216025	4.4	3.94	4.26	4.2	0.192527	271	252	254	259	8.52447
	CK	2.87	2.6	2.9	2.79	0.134907	1125	14.7	15.3	15	15	0.244949	3.19	2.94	2.87	3	0.137356	230	217	216	221	6.37704
Youjin	T1	2.82	2.61	2.85	2.76	0.106771	1125	15.9	15.2	15.7	15.6	0.294392	3.45	3.02	3.43	3.3	0.198158	222	216	216	218	2.82843
	T2	3.27	3.05	3.04	3.12	0.106145	1125	17.4	16.3	17	16.9	0.454606	3.84	3.52	3.74	3.7	0.133666	246	230	241	239	6.68331
	T3	3.63	3.41	3.46	3.5	0.094163	1125	18.4	17.6	18.6	18.2	0.432049	4.06	3.74	3.9	3.9	0.130639	262	241	238	247	10.6771
	CK	2.52	2.17	2.33	2.34	0.143062	1125	15.3	14.6	14.2	14.7	0.454606	2.98	2.65	2.77	2.8	0.136382	209	187	201	199	9.09212
Zhongshu 4	T1	3.44	3.19	3.18	3.27	0.120277	1125	17.7	16.8	17.7	17.4	0.424264	4.09	3.74	3.87	3.9	0.144453	285	263	262	270	10.6145
	T2	4.02	3.72	3.93	3.89	0.125698	1125	19.3	18.6	18.8	18.9	0.294392	4.47	4.05	4.38	4.3	0.180555	290	276	292	286	7.11805
	T3	4.35	4.14	4.29	4.26	0.0883176	1125	20.3	19.4	19.7	19.8	0.374166	4.6	4.32	4.58	4.5	0.127541	295	286	289	290	3.74166
	CK	2.9	2.75	2.81	2.82	0.0616441	1125	16.4	15.8	16.4	16.2	0.282843	3.84	3.41	3.55	3.6	0.179072	254	243	250	249	4.54606
Feiwurita	T1	2.94	2.72	2.89	2.85	0.094163	1125	19.4	18.7	19.8	19.3	0.454606	4.08	3.81	3.81	3.9	0.127279	234	221	226	227	5.35413
	T2	3.39	3.11	3.22	3.24	0.115181	1125	20.3	19.7	20.3	20.1	0.282843	4.35	4.02	4.23	4.2	0.136382	246	232	242	240	5.88784
	T3	3.78	3.5	3.52	3.6	0.127541	1125	20.6	21.2	20.9	20.9	0.244949	4.63	4.17	4.4	4.4	0.187794	253	241	241	245	5.65685
	CK	2.76	2.49	2.58	2.61	0.11225	1125	18.3	17.8	18.2	18.1	0.216025	3.58	3.3	3.62	3.5	0.142361	209	198	205	204	4.54606
Table 10. The photosynthetic parameters index of different positions of potato bud seedling at potato tuber expansion stage.
		Chlorophyll (mg/g)					Photosynthetically active radiation (PAR) μmol·m-2·s-1	Photosynthetic rate (Pn) μmolCO2·m-2·s-1					Transpiration rate (Tr) m·mol·m-2·s-1					Stomatal Conductance (Gs) m·mol·m-2·s-1
		Group I	Group II	Group III	Average	STDEVP		Group I	Group II	Group III	Average	STDEVP	Group I	Group II	Group III	Average	STDEVP	Group I	Group II	Group III	Average	STDEVP
Fujin	T4	3.52	3.21	3.23	3.32	0.141657	1125	18.2	16.7	17	17.3	0.648074	3.75	4.12	3.83	3.9	0.158955	268	247	238	251	12.5698
	T5	3.32	3.02	3.2	3.18	0.123288	1125	17	15.9	16.3	16.4	0.454606	3.73	3.49	3.58	3.6	0.0989949	256	237	248	247	7.78888
	T6	2.97	2.69	2.86	2.84	0.115181	1125	15.9	14.7	15.6	15.4	0.509902	3.37	3.08	3.15	3.2	0.123558	239	215	233	229	10.198
	CK	2.88	2.66	2.83	2.79	0.094163	1125	14.7	15.8	14.5	15	0.571548	2.82	3.14	3.04	3	0.133666	224	209	230	221	8.83176
Youjin	T4	3.4	2.98	2.98	3.12	0.19799	1125	18	16.2	16.5	16.9	0.787401	3.85	3.51	3.74	3.7	0.141657	246	227	244	239	8.52447
	T5	2.99	2.71	3.12	2.94	0.171075	1125	16.9	15.4	16.3	16.2	0.616441	3.72	3.4	3.68	3.6	0.142361	239	220	246	235	10.9848
	T6	2.54	2.29	2.43	2.42	0.102307	1125	15.3	14.1	15.3	14.9	0.565685	3.21	2.74	2.75	2.9	0.219241	210	201	195	202	6.16441
	CK	2.49	2.08	2.45	2.34	0.184572	1125	15.2	13.8	15.1	14.7	0.637704	2.91	2.67	2.82	2.8	0.0989949	192	194	211	199	8.52447
Zhongshu 4	T4	4.02	3.65	4	3.89	0.169902	1125	20	17.8	18.9	18.9	0.898146	4.49	4.23	4.18	4.3	0.135892	291	277	290	286	6.37704
	T5	3.85	3.59	3.6	3.68	0.120277	1125	18.4	16.3	18.7	17.8	1.06771	4.27	4.22	3.81	4.1	0.206074	281	274	279	278	2.94392
	T6	3.07	2.85	2.87	2.93	0.0993311	1125	17.2	15.6	16.4	16.4	0.653197	3.85	3.59	3.66	3.7	0.109848	263	242	251	252	8.60233
	CK	2.94	2.62	2.9	2.82	0.142361	1125	17	15.7	15.9	16.2	0.571548	3.8	3.48	3.52	3.6	0.142361	239	253	255	249	7.11805
Feiwurita	T4	3.4	3.05	3.27	3.24	0.144453	1125	21.2	19	20.1	20.1	0.898146	4.29	4.09	4.22	4.2	0.0828654	244	232	244	240	5.65685
	T5	3.13	2.92	3.19	3.08	0.115758	1125	20.3	18.3	19.6	19.4	0.828654	4.25	3.85	4.2	4.1	0.177951	237	229	239	235	4.32049
	T6	2.96	2.69	2.78	2.81	0.11225	1125	19.2	17.4	18.3	18.3	0.734847	3.86	3.37	3.57	3.6	0.201163	217	202	211	210	6.16441
	CK	2.69	2.74	2.4	2.61	0.149889	1125	19	17.7	17.6	18.1	0.637704	3.6	3.38	3.52	3.5	0.0909212	209	198	205	204	4.54606
Table 11. Comparison of phenological periods of potato seedling with different length bud.
Treatments		Colonization time (month / day)	Harvest time (month / day)	Growth days in shed (day)	Relative growth days
Fujin	T1	2021-04-20	2021-06-18	58	-7
	T2	2021-04-20	2021-06-13	53	-12
	T3	2021-04-20	2021-06-12	52	-13
	T4	2021-04-20	2021-06-13	53	-12
	T5	2021-04-20	2021-06-17	57	-8
	T6	2021-04-20	2021-06-23	63	-2
	CK	2021-04-20	2021-06-25	65	0
Youjin	T1	2021-04-20	2021-06-20	60	-6
	T2	2021-04-20	2021-06-16	56	-11
	T3	2021-04-20	2021-06-14	54	-13
	T4	2021-04-20	2021-06-16	56	-11
	T5	2021-04-20	2021-06-20	60	-7
	T6	2021-04-20	2021-06-25	65	-2
	CK	2021-04-20	2021-06-27	67	0
Zhongshu 4	T1	2021-04-20	2021-06-16	56	-8
	T2	2021-04-20	2021-06-12	52	-12
	T3	2021-04-20	2021-06-11	51	-13
	T4	2021-04-20	2021-06-12	52	-12
	T5	2021-04-20	2021-06-15	55	-9
	T6	2021-04-20	2021-06-21	61	-3
	CK	2021-04-20	2021-06-24	64	0
Feiwurita	T1	2021-04-20	2021-06-18	58	-7
	T2	2021-04-20	2021-06-13	53	-12
	T3	2021-04-20	2021-06-12	52	-13
	T4	2021-04-20	2021-06-18	58	-12
	T5	2021-04-20	2021-06-22	62	-8
	T6	2021-04-20	2021-06-26	66	-4
	CK	2021-04-20	2021-06-30	70	0
Table 12. Effects of different length potato bud seedling on potato yield.
		Number of tubers per plant (PCs.)				Average weight per potato (g)				Average plot yield (kg)				Yield per mu (kg / 667m2)				Relative yield %
		Group I	Group II	Group III	Average	Group I	Group II	Group III	Average	Group I	Group II	Group III	Average	Group I	Group II	Group III	Average
Fujin	T1	4	5	3	4	141.27	130.69	138.68	136.88	22.52	21.74	21.44	21.9	2498.25	2397.42	2408.49	2434.72	110.27
	T2	4	4	4	4	152.33	146.17	149.79	149.43	26.67	26.02	26.21	26.3	3009.61	2907.18	2854.34	2923.71	132.41
	T3	5	6	4	5	155.2	147.36	147.77	150.11	27.4	26.84	26.82	27.02	2917.27	3104.58	2990.54	3004.13	136.05
	CK	4	4	4	4	124.58	118.27	121.08	121.31	19.6	19.24	19.39	19.41	2194.16	2131.43	2148.59	2158.06	100
Youjin	T1	4	4	4	4	160.09	155.44	159.58	158.37	25.67	24.98	25.37	25.34	2901.27	2796.18	2751.93	2816.46	116.91
	T2	4	4	4	4	196.68	190.17	195.45	194.1	30.42	29.9	30.52	30.28	3381.78	3342.17	3375.64	3366.53	139.74
	T3	4	4	4	4	193.04	191.21	192.14	192.13	31.02	30.64	30.56	30.74	3459.16	3395.2	3397.36	3417.24	141.84
	CK	5	5	5	5	122.66	118.17	120.34	120.39	21.93	21.4	21.68	21.67	2417.5	2397.44	2412.57	2409.17	100
Zhongshu 4	T1	4	4	4	4	153.47	150.21	154.75	152.81	24.74	24.05	24.56	24.45	2684.17	2795.34	2674.97	2718.16	113.45
	T2	4	4	4	4	205.16	201.3	204.01	203.49	31.25	30.27	31.27	30.93	3450.96	3417.24	3449.67	3439.29	143.55
	T3	4	4	4	4	189.27	187.01	186.91	187.73	31.96	31.06	31.6	31.54	3580.16	3474.55	3464.52	3506.41	146.35
	CK	4	4	4	4	136.06	133.01	135	134.69	21.7	21.25	21.7	21.55	2402.27	2386.05	2399.17	2395.83	100
Feiwurita	T1	4	4	4	4	152.29	149.36	151.53	151.06	24.39	23.96	24.16	24.17	2709.01	2627.18	2725.23	2687.14	120.1
	T2	4	4	4	4	189.03	186.32	186.76	187.37	28.77	27.99	28.68	28.48	3178.34	3141.39	3179.86	3166.53	141.53
	T3	4	4	4	4	181.55	178.88	181.25	180.56	29.2	28.64	28.83	28.89	3284.56	3156.17	3192.99	3211.24	143.53
	CK	4	4	4	4	127.36	124.14	125.93	125.81	20.43	19.88	20.08	20.13	2253.67	2210.19	2248.28	2237.38	100
Table 13. Effects of different position potato bud seedling on potato yield.
		Number of tubers per plant (PCs.)				Average weight per potato (g)				Average plot yield (kg)				Yield per mu (kg / 667m2)				Relative yield %
		Group I	Group II	Group III	Average	Group I	Group II	Group III	Average	Group I	Group II	Group III	Average	Group I	Group II	Group III	Average
Fujin	T4	4	4	4	4	147.69	151.62	148.98	149.43	26.95	26.89	25.06	26.3	2919.22	2956.68	2895.23	2923.71	132.41
	T5	5	5	5	5	139.78	134.64	139.25	137.89	25.62	23.21	25.63	24.82	2764.89	2802.57	2710.26	2759.24	124.96
	T6	4	4	4	4	126.01	125.68	129.31	127	19.58	21.68	19.7	20.32	2241.73	2234.25	2302.01	2259.33	102.32
	CK	4	4	4	4	122.85	126.01	123.56	124.14	20.15	20.68	18.75	19.86	2195.43	2228.5	2200.25	2208.06	100
Youjin	T4	4	4	4	4	193.05	194.05	195.2	194.1	30.87	28.68	31.29	30.28	3391.09	3310.29	3398.21	3366.53	139.74
	T5	4	4	4	4	181.26	182.01	175.98	179.75	29.98	27.59	28.71	28.76	3226.1	3208.69	3155.64	3196.81	132.69
	T6	5	5	5	5	131.7	129.25	132.89	131.28	23.45	25.05	22.39	23.63	2593.83	2598.56	2689.15	2627.18	109.05
	CK	5	5	5	5	121.21	116.98	122.98	120.39	22.23	19.89	22.89	21.67	2412.3	2389.65	2425.56	2409.17	100
Zhongshu 4	T4	4	4	4	4	208.69	200.21	201.57	203.49	29.62	31.58	31.59	30.93	3417.06	3499.56	3401.25	3439.29	143.55
	T5	4	4	4	4	185.18	178.23	185.98	183.13	29.44	27.59	30.87	29.3	3270.89	3201.24	3298.36	3256.83	135.94
	T6	4	4	4	4	137.99	132.58	139.32	136.63	22	21.56	22.02	21.86	2382.83	2485.25	2412.02	2426.7	101.29
	CK	4	4	4	4	136.47	130.28	137.32	134.69	21.64	20.12	22.89	21.55	2397.64	2357.84	2432.01	2395.83	100
Feiwurita	T4	4	4	4	4	185.74	186.12	190.25	187.37	28.76	29.58	27.12	28.48	3174.7	3124.68	3200.21	3166.53	141.53
	T5	4	4	4	4	165.28	171.25	174.04	170.19	26.55	26.12	29.02	27.23	3034.72	2989.98	3056.21	3026.97	135.29
	T6	4	4	4	4	133.49	129.68	136.01	133.06	21.19	20.12	22.56	21.29	2400.93	2311.58	2389.21	2367.24	105.8
	CK	4	4	4	4	128.44	126.91	122.08	125.81	19.8	20.01	20.58	20.13	2241.61	2269.25	2201.28	2237.38	100
Table 14. Effects of different length potato bud seedling on potato quality.
		Starch (%)				Reducing sugar (%)				Crude protein (%)				VC content (mg / 100g)				Commercial potato rate%
		Group I	Group II	Group III	Average	Group I	Group II	Group III	Average	Group I	Group II	Group III	Average	Group I	Group II	Group III	Average
Fujin	T1	14.09	14.05	14.22	14.12	0.088	0.078	0.092	0.086	1.671	1.596	1.521	1.596	0.295	0.298	0.289	0.294	86.9
	T2	14.41	14.28	14.45	14.38	0.089	0.085	0.096	0.09	1.591	1.598	1.635	1.608	0.291	0.32	0.346	0.319	88.8
	T3	14.26	14.38	14.56	14.4	0.093	0.094	0.089	0.092	1.555	1.568	1.689	1.604	0.289	0.322	0.325	0.312	89.2
	CK	14.08	14.02	14.2	14.1	0.078	0.092	0.082	0.084	1.581	1.602	1.578	1.587	0.249	0.291	0.3	0.28	84.7
Youjin	T1	13.64	13.45	13.56	13.55	0.06	0.061	0.068	0.063	1.392	1.391	1.402	1.395	0.297	0.298	0.269	0.288	91.7
	T2	13.68	13.89	13.68	13.75	0.063	0.071	0.064	0.066	1.489	1.425	1.325	1.413	0.201	0.389	0.301	0.297	92.9
	T3	13.63	13.63	13.6	13.62	0.066	0.066	0.069	0.067	1.367	1.386	1.456	1.403	0.284	0.298	0.288	0.29	93.1
	CK	13.51	13.48	13.39	13.46	0.054	0.065	0.07	0.063	1.433	1.326	1.402	1.387	0.284	0.284	0.275	0.281	90.8
Zhongshu 4	T1	12.36	12.4	12.56	12.44	0.427	0.422	0.429	0.426	1.504	1.501	1.549	1.518	27.5	26.5	25.8	26.6	85.1
	T2	12.62	12.8	12.59	12.67	0.447	0.429	0.432	0.436	1.536	1.503	1.542	1.527	28.36	27.59	28.98	28.31	88.8
	T3	12.69	12.6	12.45	12.58	0.439	0.432	0.44	0.437	1.552	1.456	1.564	1.524	27.65	28.23	28	27.96	89.3
	CK	12.34	12.42	12.35	12.37	0.423	0.401	0.415	0.413	1.538	1.462	1.521	1.507	26.19	28.12	27.59	27.3	83.9
Feiwurita	T1	12.34	12.12	12.32	12.26	0.97	1.01	1.08	1.02	0.936	0.989	1.102	1.009	121.04	123.89	124.58	123.17	87
	T2	12.33	12.24	12.45	12.34	1.037	1.021	1.035	1.031	0.971	0.986	1.1	1.019	122.81	122.98	125.01	123.6	89.2
	T3	12.37	12.3	12.44	12.37	1.037	1.029	1.039	1.035	0.964	0.987	1.103	1.018	123.85	123.13	124.12	123.7	89.4
	CK	12.14	12.41	12.5	12.35	1.014	1.021	1.007	1.014	1.012	0.982	1.009	1.001	123.01	123.58	122.02	122.87	86.1
Table 15. Effects of different position potato bud seedling on potato quality.
		Starch (%)				Reducing sugar (%)				Crude protein (%)				VC content (mg / 100g)				Commercial potato rate%
		Group I	Group II	Group III	Average	Group I	Group II	Group III	Average	Group I	Group II	Group III	Average	Group I	Group II	Group III	Average
Fujin	T4	14.27	14.31	14.56	14.38	0.088	0.093	0.089	0.09	1.611	1.601	1.612	1.608	0.321	0.315	0.321	0.319	88.8
	T5	14.25	14.29	14.18	14.24	0.087	0.085	0.089	0.087	1.609	1.597	1.6	1.602	0.285	0.298	0.287	0.29	87.9
	T6	14.03	14.15	14.18	14.12	0.089	0.08	0.086	0.085	1.599	1.605	1.599	1.601	0.289	0.279	0.281	0.283	86.8
	CK	14.03	14.18	14.09	14.1	0.088	0.079	0.085	0.084	1.585	1.584	1.592	1.587	0.285	0.271	0.284	0.28	84.7
Youjin	T4	13.77	13.68	13.8	13.75	0.068	0.061	0.069	0.066	1.416	1.409	1.414	1.413	0.3	0.291	0.3	0.297	92.9
	T5	13.5	13.59	13.71	13.6	0.069	0.066	0.06	0.065	1.409	1.406	1.412	1.409	0.287	0.294	0.289	0.29	92.4
	T6	13.58	13.61	13.52	13.57	0.063	0.064	0.062	0.063	1.391	1.39	1.395	1.392	0.286	0.285	0.281	0.284	91.7
	CK	13.49	13.39	13.5	13.46	0.057	0.063	0.069	0.063	1.388	1.384	1.389	1.387	0.282	0.283	0.278	0.281	90.8
Zhongshu 4	T4	12.68	12.71	12.62	12.67	0.436	0.432	0.44	0.436	1.526	1.53	1.525	1.527	28.388	28.396	28.389	28.391	88.8
	T5	12.58	12.5	12.6	12.56	0.429	0.421	0.431	0.427	1.521	1.515	1.524	1.52	27.935	27.952	27.939	27.942	87.2
	T6	12.37	12.43	12.34	12.38	0.416	0.41	0.419	0.415	1.52	1.512	1.522	1.518	27.62	27.612	27.634	27.622	85.9
	CK	12.33	12.45	12.33	12.37	0.417	0.412	0.41	0.413	1.51	1.501	1.51	1.507	27.293	27.301	27.315	27.303	83.9
Feiwurita	T4	12.43	12.3	12.29	12.34	1.034	1.029	1.03	1.031	1.019	1.023	1.015	1.019	126.578	126.521	126.71	126.603	89.2
	T5	12.21	12.25	12.35	12.27	1.028	1.024	1.029	1.027	1.01	1.012	1.008	1.01	124.682	124.612	124.398	124.564	88.8
	T6	12.33	12.34	12.2	12.29	1.015	1.011	1.019	1.015	1.006	1.001	1.005	1.004	123.138	122.857	122.96	122.985	87.9
	CK	12.23	12.31	12.21	12.25	1.015	1.016	1.011	1.014	1	0.998	1.005	1.001	122.923	122.901	122.789	122.871	86.1
